# Supplementary material for: Designing anti-bacterial supramolecular gels from primary ammonium dicarboxylate (PAD) salts for self-delivery applications
Source: Royal Society of Chemistry journal article supplement (doi:10.1039/d4fd00154k), 2025-01-01
Supplement: d4fd00154k1.pdf [file d4fd00154k1.pdf]

## Supporting Information

# Designing Anti-bacterial Supramolecular Gels from Primary Ammonium Dicarboxylate (PAD) salts for Self-Delivery Applications.

**Authors** Nabanita Roy, Subhajit Ghosh, Abhishek Dutta and Parthasarathi Dastidar\*

**Affiliation** School of Chemical Sciences, Indian Association for the Cultivation of Science (IACS), 2A and 2B, Raja S. C. Mullick Road, Jadavpur, Kolkata-700032, West Bengal (India).

**E mail.** [ocpdastidar@gmail.com](mailto:ocpdastidar@gmail.com), [ocpd@iacs.res.in](mailto:ocpd@iacs.res.in)

# Table of Contents

| <b>Serial No.</b> | <b>Topics</b>                                                                                                    | <b>Page No.</b> |
|-------------------|------------------------------------------------------------------------------------------------------------------|-----------------|
| 1                 | FT-IR data of salts                                                                                              | 3-4             |
| 2                 | Gelation table                                                                                                   | 4-5             |
| 3                 | $T_{gel}$ , MGC of the MS gels                                                                                   | 5               |
| 4                 | Amplitude sweep experiments of gels                                                                              | 6               |
| 5                 | tan $\delta$ table of gels                                                                                       | 6               |
| 6                 | Crystallographic data table                                                                                      | 7               |
| 7                 | ORTEPs and H-bonding table                                                                                       | 8-15            |
| 8                 | PXRD plots of gelators and non gelators                                                                          | 16              |
| 9                 | Zone Inhibition assay of gelators                                                                                | 17              |
| 10                | Determination of MIC                                                                                             | 18              |
| 11                | MTT assay of $C_{14}$ •2MAF against Hek 293 and <i>E. dermatol.</i>                                              | 19              |
| 12                | Colony inhibition assay of $C_{14}$ •2MAF against <i>P. aeruginosa</i> , <i>S. aureus</i> and <i>B. subtilis</i> | 19              |
| 13                | Component dependent turbidity assay of $C_{14}$ •2MAF                                                            | 20              |
| 14                | Calibration curve of $C_{14}$ •2MAF in water.                                                                    | 20              |
| 15                | Comparative rheology data of gels                                                                                | 21              |
| 16                | PXRD and Zone-inhibition of crystals $C_{10}$ -H•AMN and [ $C_{14}$ •2MAF]. $C_{14}$ -H <sub>2</sub>             | 21              |

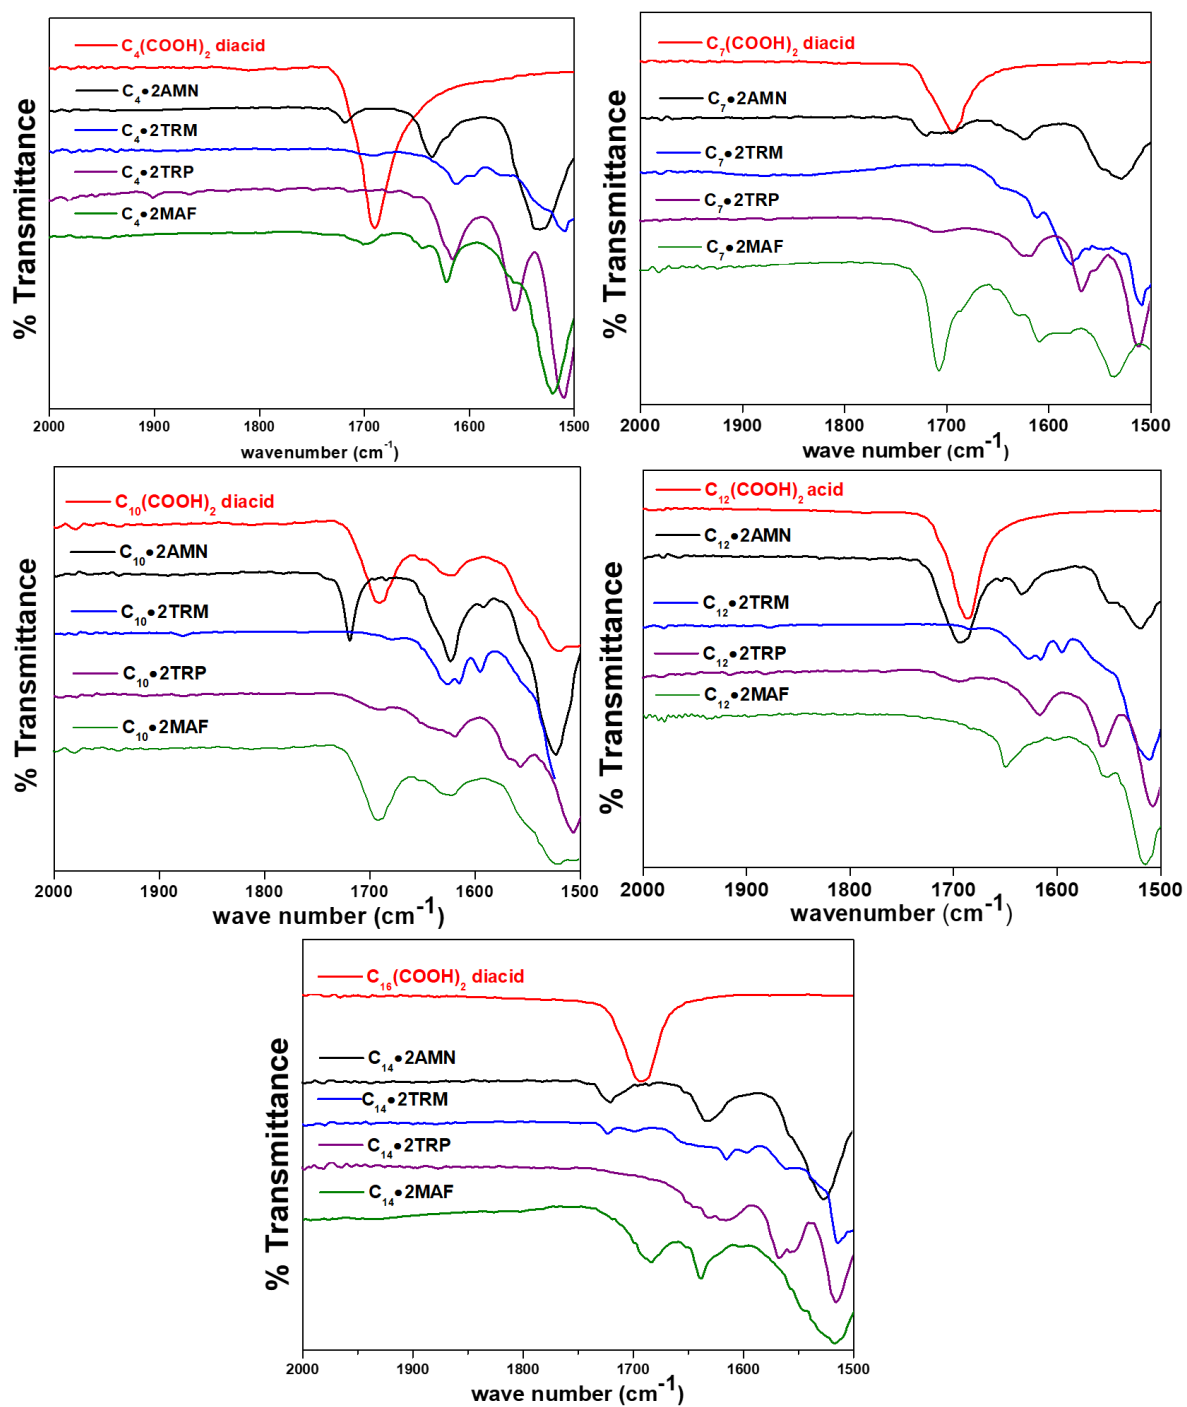

Fig. S1 FT-IR spectra of the salts.

**Table S1 Approximate shifts in the FT-IR stretching frequencies upon salt formation from carboxylic acids to carboxylates.**

| Dicarboxylic acids                  | IR str. Freq. of >COOH diacids in | Salts                 | IR str. Freq. of >COO <sup>-</sup> in salts | $\Delta\bar{\nu}$ shifts in salts |
|-------------------------------------|-----------------------------------|-----------------------|---------------------------------------------|-----------------------------------|
| C <sub>4</sub> (COOH) <sub>2</sub>  | 1690                              | C <sub>4</sub> •2AMN  | 1636                                        | 54                                |
|                                     |                                   | C <sub>4</sub> •2TRM  | 1613                                        | 77                                |
|                                     |                                   | C <sub>4</sub> •2TRP  | 1616                                        | 74                                |
|                                     |                                   | C <sub>4</sub> •2MAF  | 1622                                        | 68                                |
| C <sub>7</sub> (COOH) <sub>2</sub>  | 1693                              | C <sub>7</sub> •2AMN  | 1625                                        | 68                                |
|                                     |                                   | C <sub>7</sub> •2TRM  | 1612                                        | 81                                |
|                                     |                                   | C <sub>7</sub> •2TRP  | 1622                                        | 71                                |
|                                     |                                   | C <sub>7</sub> •2MAF  | 1707, 1631                                  | -14                               |
| C <sub>10</sub> (COOH) <sub>2</sub> | 1691                              | C <sub>10</sub> •2AMN | 1719, 1623                                  | -28                               |
|                                     |                                   | C <sub>10</sub> •2TRM | 1629                                        | 62                                |
|                                     |                                   | C <sub>10</sub> •2TRP | 1644                                        | 47                                |
|                                     |                                   | C <sub>10</sub> •2MAF | 1691, 1624                                  | 0                                 |
| C <sub>12</sub> (COOH) <sub>2</sub> | 1690                              | C <sub>12</sub> •2AMN | 1693, 1635                                  | -3                                |
|                                     |                                   | C <sub>12</sub> •2TRM | 1629                                        | 61                                |
|                                     |                                   | C <sub>12</sub> •2TRP | 1617                                        | 73                                |
|                                     |                                   | C <sub>12</sub> •2MAF | 1651                                        | 39                                |
| C <sub>14</sub> (COOH) <sub>2</sub> | 1692                              | C <sub>14</sub> •2AMN | 1720, 1632                                  | -28                               |
|                                     |                                   | C <sub>14</sub> •2TRM | 1616                                        | 76                                |
|                                     |                                   | C <sub>14</sub> •2TRP | 1617                                        | 75                                |
|                                     |                                   | C <sub>14</sub> •2MAF | 1681                                        | 11                                |

**Table S2 Gelation table**

| Organic salts         | water | Methyl salicylate (MS) | 19 DMSO/water | 11 DMSO/water |
|-----------------------|-------|------------------------|---------------|---------------|
| C <sub>4</sub> •2AMN  | P     | GP                     | P             | P             |
| C <sub>4</sub> •2TRM  | S     | GP                     | S             | S             |
| C <sub>4</sub> •2TRP  | S     | P                      | S             | S             |
| C <sub>4</sub> •2MAF  | S     | INS                    | S             | S             |
| C <sub>7</sub> •2AMN  | P     | <b>G</b>               | P             | P             |
| C <sub>7</sub> •2TRM  | S     | PS                     | S             | S             |
| C <sub>7</sub> •2TRP  | S     | GP                     | S             | S             |
| C <sub>7</sub> •2MAF  | S     | GP                     | P             | S             |
| C <sub>10</sub> •2AMN | P     | <b>G</b>               | P             | P             |
| C <sub>10</sub> •2TRM | S     | P                      | S             | S             |
| C <sub>10</sub> •2TRP | INS   | P                      | P             | S             |
| C <sub>10</sub> •2MAF | S     | P                      | WG            | S             |
| C <sub>12</sub> •2AMN | INS   | <b>G</b>               | INS           | P             |

|                       |     |          |     |   |
|-----------------------|-----|----------|-----|---|
| C <sub>12</sub> •2TRM | PS  | <b>G</b> | INS | S |
| C <sub>12</sub> •2TRP | PS  | <b>G</b> | INS | S |
| C <sub>12</sub> •2MAF | GP  | <b>G</b> | P   | S |
|                       |     |          |     |   |
| C <sub>14</sub> •2AMN | INS | <b>G</b> | P   | P |
| C <sub>14</sub> •2TRM | P   | GP       | INS | S |
| C <sub>14</sub> •2TRP | P   | GP       | INS | S |
| C <sub>14</sub> •2MAF | GP  | <b>G</b> | P   | S |

**S**= Soluble; **PS**= Partially soluble; **INS**=Insoluble; **P**=Precipitate; **GP**=Gelatinous precipitate;  
**G**=Gel

**Table S3 MGC and  $T_{gel}$  table for various gels.**

| <b>Gels</b>                | <b>Solvent</b> | <b>MGC</b> | <b><math>T_{gel}</math> at 10 wt. % (in °C)</b> |
|----------------------------|----------------|------------|-------------------------------------------------|
| <b>C<sub>7</sub>•2AMN</b>  | <b>MS</b>      | <b>8</b>   | <b>65</b>                                       |
| <b>C<sub>10</sub>•2AMN</b> | <b>MS</b>      | <b>8</b>   | <b>57</b>                                       |
| <b>C<sub>12</sub>•2AMN</b> | <b>MS</b>      | <b>10</b>  | <b>52</b>                                       |
| <b>C<sub>12</sub>•2TRM</b> | <b>MS</b>      | <b>10</b>  | <b>87</b>                                       |
| <b>C<sub>12</sub>•2TRP</b> | <b>MS</b>      | <b>6</b>   | <b>85</b>                                       |
| <b>C<sub>12</sub>•2MAF</b> | <b>MS</b>      | <b>10</b>  | <b>72</b>                                       |
| <b>C<sub>14</sub>•2AMN</b> | <b>MS</b>      | <b>10</b>  | <b>64</b>                                       |
| <b>C<sub>14</sub>•2MAF</b> | <b>MS</b>      | <b>8</b>   | <b>89</b>                                       |

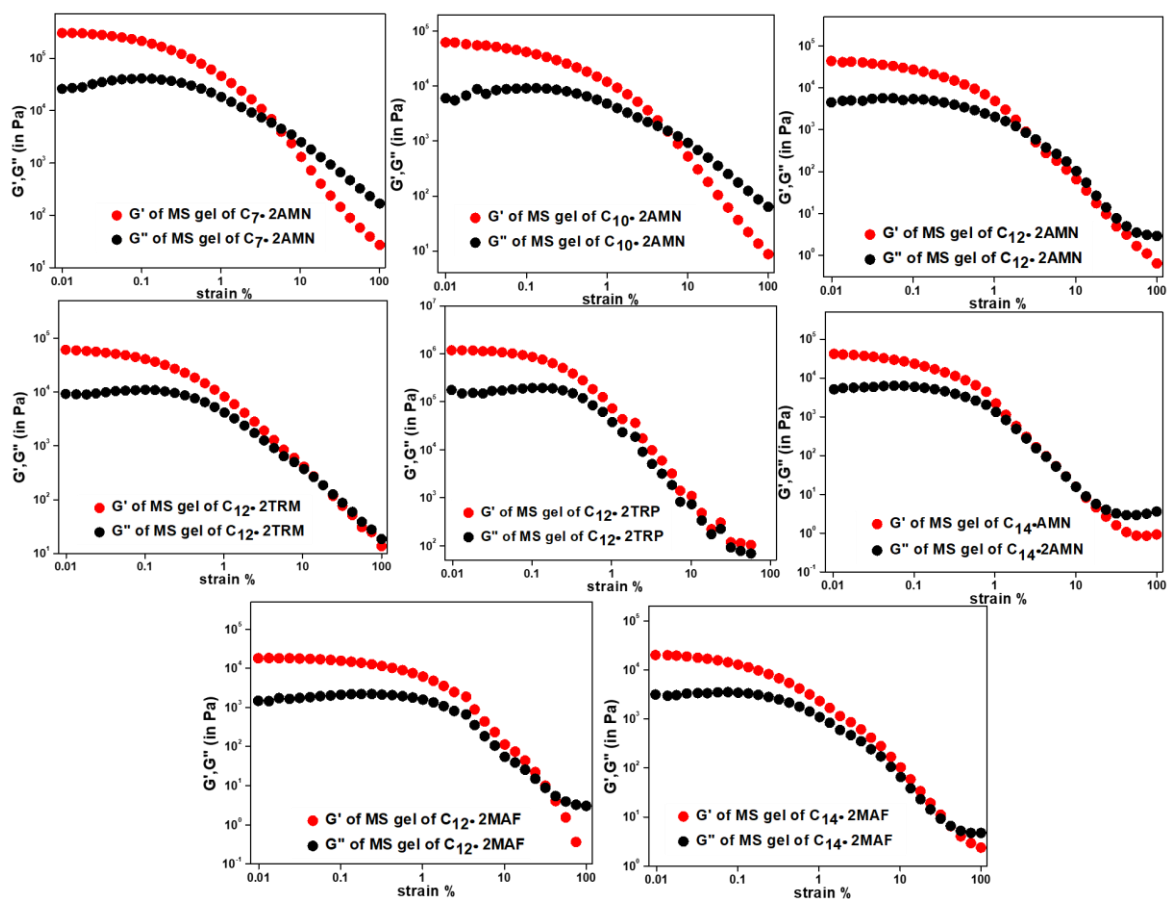

Fig. S2 Amplitude sweep experiments of the 10 wt. % MS gels

Table S4  $\tan \delta$  ( $G''/G'$ ) values of the reported gels.

| Gels                       | $G'$ (in Pa) | $G''$ (in Pa) | $\tan \delta$ ( $G''/G'$ ) |
|----------------------------|--------------|---------------|----------------------------|
| <b>C<sub>7</sub>•2AMN</b>  | 362687.5     | 49156.25      | <b>0.135</b>               |
| <b>C<sub>10</sub>•2AMN</b> | 114337.5     | 17633.75      | <b>0.162</b>               |
| <b>C<sub>12</sub>•2AMN</b> | 90568.75     | 12698.125     | <b>0.144</b>               |
| <b>C<sub>12</sub>•2TRM</b> | 207625       | 45412.5       | <b>0.235</b>               |
| <b>C<sub>12</sub>•2TRP</b> | 557937.5     | 85593.75      | <b>0.156</b>               |
| <b>C<sub>12</sub>•2MAF</b> | 15875        | 4491.875      | <b>0.284</b>               |
| <b>C<sub>14</sub>•2AMN</b> | 23956.25     | 2879.375      | <b>0.124</b>               |
| <b>C<sub>14</sub>•2MAF</b> | 32200        | 7250.625      | <b>0.241</b>               |

**Table S5 Crystallographic data table.**

|                                             | <b>C<sub>4</sub>•2AMN</b>                                     | <b>C<sub>4</sub>•2TRM</b>                                     | <b>C<sub>4</sub>•2TRP</b>                                     | <b>C<sub>4</sub>•2MAF</b>                                                    | <b>C<sub>7</sub>•2AMN</b>                                     | <b>C<sub>10</sub>-H•AMN</b>                                   | <b>C<sub>10</sub>•2TRM</b>                                    | <b>C<sub>10</sub>•2TRP</b>                                    | <b>[C<sub>14</sub>•2MAF].C<sub>14</sub>-H<sub>2</sub></b>       |
|---------------------------------------------|---------------------------------------------------------------|---------------------------------------------------------------|---------------------------------------------------------------|------------------------------------------------------------------------------|---------------------------------------------------------------|---------------------------------------------------------------|---------------------------------------------------------------|---------------------------------------------------------------|-----------------------------------------------------------------|
| Crystallising solvent                       | MeOH                                                          | EtOH                                                          | MeOH+ DCM                                                     | H <sub>2</sub> O+ MeOH                                                       | MeOH                                                          | MeOH                                                          | DMSO                                                          | MeOH+ DCM                                                     | MeOH+ DCM                                                       |
| Empirical formula                           | C <sub>26</sub> H <sub>44</sub> N <sub>2</sub> O <sub>4</sub> | C <sub>33</sub> H <sub>48</sub> N <sub>3</sub> O <sub>9</sub> | C <sub>26</sub> H <sub>34</sub> N <sub>4</sub> O <sub>4</sub> | C <sub>20</sub> H <sub>22</sub> N <sub>4</sub> O <sub>8</sub> S <sub>2</sub> | C <sub>29</sub> H <sub>50</sub> N <sub>2</sub> O <sub>4</sub> | C <sub>22</sub> H <sub>39</sub> NO <sub>4</sub>               | C <sub>28</sub> H <sub>44</sub> N <sub>2</sub> O <sub>6</sub> | C <sub>32</sub> H <sub>46</sub> N <sub>4</sub> O <sub>4</sub> | C <sub>23</sub> H <sub>40</sub> N <sub>2</sub> O <sub>6</sub> S |
| Formula weight                              | 448.63                                                        | 630.74                                                        | 466.57                                                        | 510.53                                                                       | 490.71                                                        | 381.54                                                        | 504.65                                                        | 550.73                                                        | 472.63                                                          |
| Temperature/K                               | 146.55                                                        | 145.01                                                        | 296.15                                                        | 147.9                                                                        | 273.15                                                        | 273.15                                                        | 298.66                                                        | 296.15                                                        | 295.75                                                          |
| Crystal system                              | triclinic                                                     | triclinic                                                     | monoclinic                                                    | monoclinic                                                                   | monoclinic                                                    | triclinic                                                     | orthorhombic                                                  | triclinic                                                     | triclinic                                                       |
| Space group                                 | <i>P</i> $\bar{1}$                                            | <i>P</i> $\bar{1}$                                            | <i>P</i> 2 <sub>1</sub> / <i>n</i>                            | <i>P</i> 2 <sub>1</sub> / <i>n</i>                                           | <i>P</i> 2 <sub>1</sub> / <i>c</i>                            | <i>P</i> $\bar{1}$                                            | <i>Pca</i> 2 <sub>1</sub>                                     | <i>P</i> $\bar{1}$                                            | <i>P</i> $\bar{1}$                                              |
| a/Å                                         | 6.5625(4)                                                     | 11.4038(8)                                                    | 9.788(6)                                                      | 10.4623(3)                                                                   | 20.775(19)                                                    | 6.683(2)                                                      | 21.69(3)                                                      | 6.4847(19)                                                    | 5.8262(16)                                                      |
| b/Å                                         | 13.4728(9)                                                    | 12.7819(7)                                                    | 6.098(4)                                                      | 5.9160(2)                                                                    | 6.448(6)                                                      | 13.220(4)                                                     | 6.077(8)                                                      | 7.741(2)                                                      | 9.250(3)                                                        |
| c/Å                                         | 14.2734(8)                                                    | 13.6007(8)                                                    | 21.090(14)                                                    | 20.1437(6)                                                                   | 21.727(19)                                                    | 13.306(4)                                                     | 22.48(3)                                                      | 16.693(5)                                                     | 24.521(7)                                                       |
| $\alpha$ /°                                 | 75.183(2)                                                     | 88.897(2)                                                     | 90                                                            | 90                                                                           | 90                                                            | 107.090(4)                                                    | 90                                                            | 91.501(4)                                                     | 79.998(8)                                                       |
| $\beta$ /°                                  | 78.290(2)                                                     | 70.005(2)                                                     | 96.993(9)                                                     | 104.9680(10)                                                                 | 97.79(3)                                                      | 91.044(5)                                                     | 90                                                            | 98.704(4)                                                     | 88.376(9)                                                       |
| $\gamma$ /°                                 | 80.854(2)                                                     | 65.733(2)                                                     | 90                                                            | 90                                                                           | 90                                                            | 96.239(4)                                                     | 90                                                            | 108.733(4)                                                    | 80.227(9)                                                       |
| Volume/Å <sup>3</sup>                       | 1186.97(13)                                                   | 1681.25(18)                                                   | 1249.3(14)                                                    | 1204.49(6)                                                                   | 2884(4)                                                       | 1115.5(6)                                                     | 2963(7)                                                       | 781.9(4)                                                      | 1282.5(6)                                                       |
| Z                                           | 2                                                             | 2                                                             | 2                                                             | 2                                                                            | 4                                                             | 2                                                             | 4                                                             | 1                                                             | 2                                                               |
| $\rho_{\text{calc}}/\text{cm}^{-3}$         | 1.255                                                         | 1.246                                                         | 1.240                                                         | 1.408                                                                        | 1.130                                                         | 1.136                                                         | 1.131                                                         | 1.170                                                         | 1.224                                                           |
| $\mu/\text{mm}^{-1}$                        | 0.054                                                         | 0.090                                                         | 0.085                                                         | 0.273                                                                        | 0.074                                                         | 0.077                                                         | 0.079                                                         | 0.077                                                         | 0.165                                                           |
| F(000)                                      | 492.0                                                         | 678.0                                                         | 500.0                                                         | 532.0                                                                        | 1080.0                                                        | 420.0                                                         | 1096.0                                                        | 298.0                                                         | 512.0                                                           |
| Crystal size/mm <sup>3</sup>                | 0.2 × 0.05 × 0.04                                             | 0.4 × 0.03 × 0.02                                             | 0.4 × 0.1 × 0.03                                              | 0.3 × 0.04 × 0.02                                                            | 0.4 × 0.03 × 0.02                                             | 0.3 × 0.03 × 0.02                                             | 0.1 × 0.03 × 0.02                                             | 0.4 × 0.04 × 0.03                                             | 0.2 × 0.05 × 0.03                                               |
| Radiation                                   | AgK $\alpha$ ( $\lambda$ = 0.56086)                           | MoK $\alpha$ ( $\lambda$ = 0.71073)                           | MoK $\alpha$ ( $\lambda$ = 0.71073)                           | MoK $\alpha$ ( $\lambda$ = 0.71073)                                          | MoK $\alpha$ ( $\lambda$ = 0.71073)                           | MoK $\alpha$ ( $\lambda$ = 0.71073)                           | MoK $\alpha$ ( $\lambda$ = 0.71073)                           | MoK $\alpha$ ( $\lambda$ = 0.71073)                           | MoK $\alpha$ ( $\lambda$ = 0.71073)                             |
| 2 $\theta$ range for data collection/°      | 3.804 to 50.82                                                | 4.588 to 50.938                                               | 3.892 to 50.05                                                | 6.528 to 63.408                                                              | 1.978 to 53.266                                               | 3.206 to 50.218                                               | 5.22 to 50.47                                                 | 4.954 to 51.148                                               | 4.536 to 56.542                                                 |
| Index ranges                                | -10 ≤ h ≤ 9, -19 ≤ k ≤ 20, -21 ≤ l ≤ 17                       | -13 ≤ h ≤ 13, -15 ≤ k ≤ 15, -16 ≤ l ≤ 15                      | -11 ≤ h ≤ 11, -7 ≤ k ≤ 7, -25 ≤ l ≤ 25                        | -15 ≤ h ≤ 14, -8 ≤ k ≤ 7, -29 ≤ l ≤ 29                                       | -25 ≤ h ≤ 26, -7 ≤ k ≤ 7, -25 ≤ l ≤ 25                        | -7 ≤ h ≤ 7, -15 ≤ k ≤ 15, -15 ≤ l ≤ 15                        | -26 ≤ h ≤ 26, -7 ≤ k ≤ 7, -26 ≤ l ≤ 26                        | -7 ≤ h ≤ 7, -9 ≤ k ≤ 9, -20 ≤ l ≤ 20                          | -7 ≤ h ≤ 7, -12 ≤ k ≤ 12, -32 ≤ l ≤ 28                          |
| Reflections collected                       | 15179                                                         | 16204                                                         | 17992                                                         | 16545                                                                        | 42337                                                         | 16637                                                         | 24367                                                         | 12445                                                         | 14756                                                           |
| Independent reflections                     | 7620 [R <sub>int</sub> = 0.0586, R <sub>sigma</sub> = 0.0824] | 6172 [R <sub>int</sub> = 0.0501, R <sub>sigma</sub> = 0.0641] | 2211 [R <sub>int</sub> = 0.0323, R <sub>sigma</sub> = 0.0182] | 3967 [R <sub>int</sub> = 0.0548, R <sub>sigma</sub> = 0.0495]                | 5274 [R <sub>int</sub> = 0.1004, R <sub>sigma</sub> = 0.0600] | 3952 [R <sub>int</sub> = 0.0680, R <sub>sigma</sub> = 0.0666] | 5191 [R <sub>int</sub> = 0.0719, R <sub>sigma</sub> = 0.0659] | 2934 [R <sub>int</sub> = 0.0560, R <sub>sigma</sub> = 0.0561] | 6313 [R <sub>int</sub> = 0.0624, R <sub>sigma</sub> = 0.0831]   |
| Data/restraints/parameters                  | 7620/0/465                                                    | 6172/0/413                                                    | 2211/0/156                                                    | 3967/0/164                                                                   | 5274/0/319                                                    | 3952/51/254                                                   | 5191/71/341                                                   | 2934/0/182                                                    | 6313/2/333                                                      |
| Goodness-of-fit on F <sup>2</sup>           | 1.028                                                         | 1.012                                                         | 1.063                                                         | 1.036                                                                        | 1.024                                                         | 1.034                                                         | 1.046                                                         | 1.000                                                         | 1.108                                                           |
| Final R indexes [I > 2 $\sigma$ (I)]        | R <sub>1</sub> = 0.0578, wR <sub>2</sub> = 0.1435             | R <sub>1</sub> = 0.0438, wR <sub>2</sub> = 0.0930             | R <sub>1</sub> = 0.0362, wR <sub>2</sub> = 0.0909             | R <sub>1</sub> = 0.0540, wR <sub>2</sub> = 0.1553                            | R <sub>1</sub> = 0.0617, wR <sub>2</sub> = 0.1543             | R <sub>1</sub> = 0.0496, wR <sub>2</sub> = 0.1294             | R <sub>1</sub> = 0.0682, wR <sub>2</sub> = 0.1531             | R <sub>1</sub> = 0.0506, wR <sub>2</sub> = 0.1078             | R <sub>1</sub> = 0.1055, wR <sub>2</sub> = 0.2621               |
| Final R indexes [all data]                  | R <sub>1</sub> = 0.0799, wR <sub>2</sub> = 0.1675             | R <sub>1</sub> = 0.0746, wR <sub>2</sub> = 0.1086             | R <sub>1</sub> = 0.0439, wR <sub>2</sub> = 0.0964             | R <sub>1</sub> = 0.0650, wR <sub>2</sub> = 0.1671                            | R <sub>1</sub> = 0.1216, wR <sub>2</sub> = 0.1885             | R <sub>1</sub> = 0.0846, wR <sub>2</sub> = 0.1502             | R <sub>1</sub> = 0.1345, wR <sub>2</sub> = 0.1884             | R <sub>1</sub> = 0.1053, wR <sub>2</sub> = 0.1312             | R <sub>1</sub> = 0.1417, wR <sub>2</sub> = 0.2829               |
| Largest diff. peak/hole / e Å <sup>-3</sup> | 0.45/-0.36                                                    | 0.21/-0.21                                                    | 0.19/-0.17                                                    | 0.86/-0.83                                                                   | 0.35/-0.26                                                    | 0.20/-0.20                                                    | 0.44/-0.50                                                    | 0.16/-0.16                                                    | 0.59/-0.47                                                      |

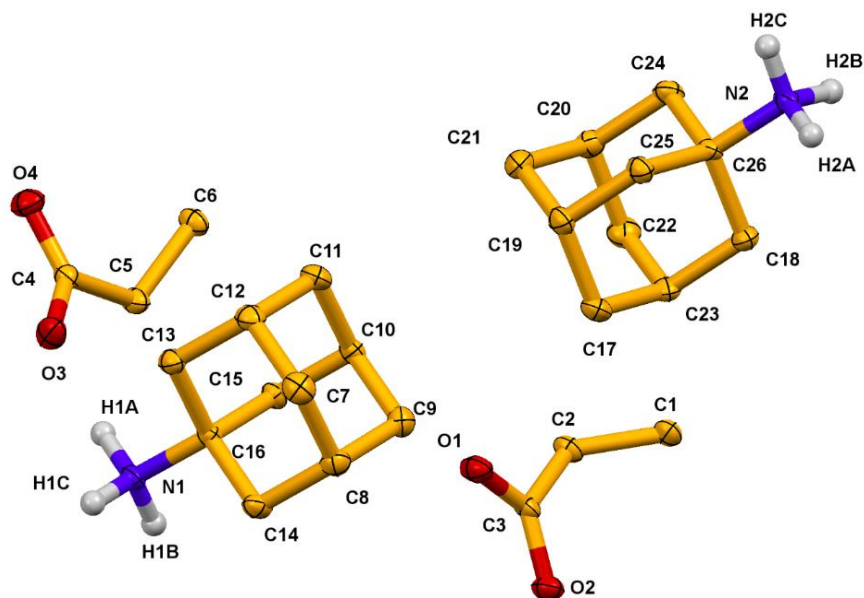

Fig. S3 ORTEP diagram of  $C_4 \cdot 2AMN$  (50% probability).

Table S6 Hydrogen bonding table of  $C_4 \cdot 2AMN$ .

| D-H...A     | d(D-A)/Å | d(H...A)/Å | d(D...A)/Å | $\angle D-H...A$ ° | Symmetry   |
|-------------|----------|------------|------------|--------------------|------------|
| N1-H1A...O3 | 0.98     | 1.85       | 2.8176(16) | 167                | x,y,z      |
| N2-H1B...O4 | 0.93     | 1.79       | 2.7165(16) | 172                | -x+1,y,-z  |
| N1-H1C...O1 | 0.93     | 1.87       | 2.7838(15) | 169                | -x,1-y,2-z |
| N2-H2A...O2 | 1.00     | 1.80       | 2.7795(16) | 166                | -x,-1+y,z  |
| N2-H2B...O3 | 0.93     | 1.89       | 2.8035(16) | 168                | 1-x,-y,2-z |
| N1-H2C...O1 | 0.93     | 1.89       | 2.7994(16) | 135                | -x,-y,2-z  |



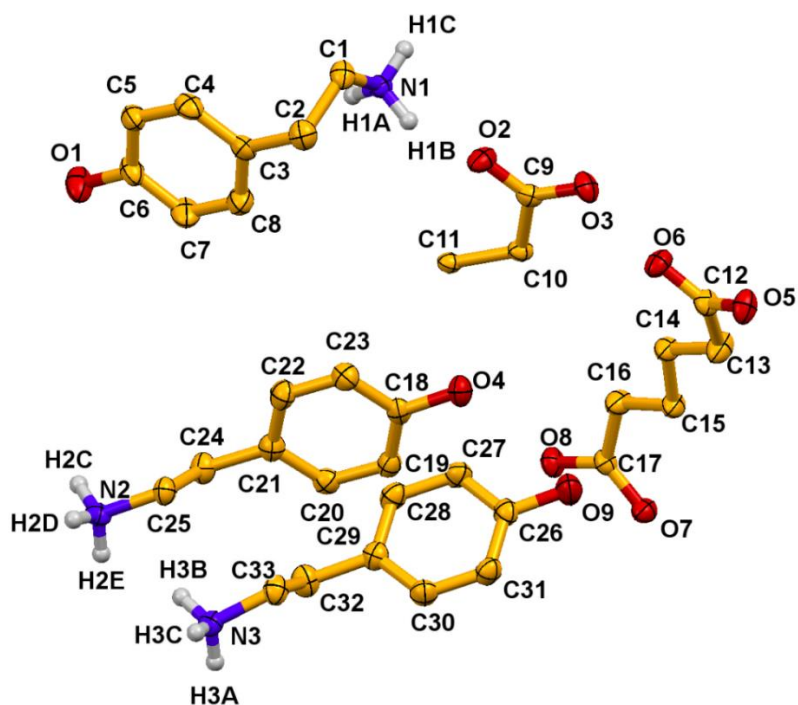

Fig. S4 ORTEP diagram of  $C_4 \cdot 2TRM$  (50% probability).

Table S7 Hydrogen bonding table of  $C_4 \cdot 2TRM$ .

| D-H...A     | d(D-A)/Å | d(H...A)/Å | d(D...A)/Å | $\angle D-H...A^\circ$ | Symmetry      |
|-------------|----------|------------|------------|------------------------|---------------|
| O1-H1...O3  | 0.84     | 1.82       | 2.656(2)   | 170                    | x, -1+y, z    |
| N1-H1A...O8 | 0.91     | 1.98       | 2.794(19)  | 148                    | 1-x, -y, -z   |
| N1-H1B...O2 | 0.91     | 1.89       | 2.725(2)   | 151                    | x, y, z       |
| N1-H1C...O7 | 0.91     | 1.99       | 2.823(2)   | 152                    | -1+x, y, z    |
| N1-H1C...O8 | 0.91     | 2.48       | 3.189(2)   | 134                    | -1+x, y, z    |
| N2-H2C...O7 | 0.91     | 1.86       | 2.745(2)   | 162                    | x, -1+y, z    |
| N2-H2D...O5 | 0.91     | 1.87       | 2.768(2)   | 169                    | x, -1+y, z    |
| N2-H2E...O2 | 0.91     | 2.07       | 2.828(3)   | 139                    | 1-x, -y, 1-z  |
| N2-H2E...O3 | 0.91     | 2.30       | 3.159(3)   | 157                    | 1+x, -1+y, z  |
| N3-H3A...O6 | 0.91     | 1.88       | 2.775(2)   | 169                    | 1+x, -1+y, z  |
| N3-H3B...O6 | 0.91     | 1.93       | 2.797(3)   | 158                    | 1-x, -y, 1-z  |
| N3-H3C...O3 | 0.91     | 1.93       | 2.804(3)   | 161                    | x, y, z       |
| O4-H4A...O8 | 0.84     | 1.86       | 2.701(2)   | 179                    | 1-x, 1-y, 1-z |
| O9-H9...O5  | 0.84     | 1.83       | 2.663(3)   | 173                    | 1-x, -1-y, -z |

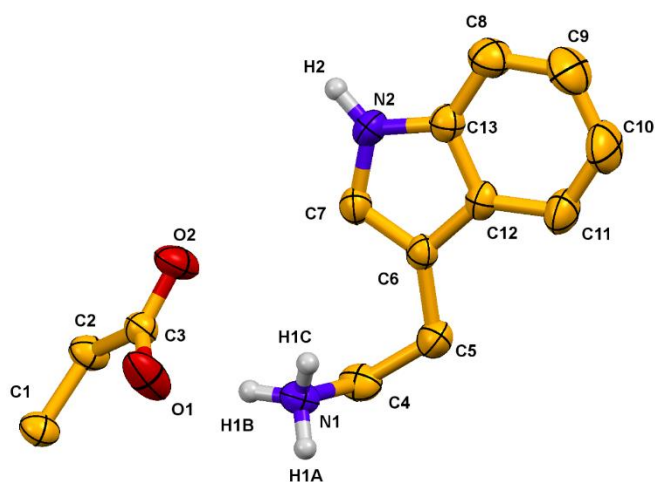

Fig. S5 ORTEP diagram of  $C_4 \cdot 2TRP$  (50% probability).

Table S8 Hydrogen bonding table of  $C_4 \cdot 2TRP$ .

| D-H...A     | d(D-A)/Å | d(H...A)/Å | d(D...A)/Å | $\angle D-H...A$ ° | Symmetry               |
|-------------|----------|------------|------------|--------------------|------------------------|
| N1-H1A...O2 | 0.89     | 1.82       | 2.710(2)   | 174                | $x, -1+y, z$           |
| N2-H1B...O1 | 0.89     | 1.86       | 2.745(2)   | 179                | $x, y, z$              |
| N1-H1C...O1 | 0.89     | 2.59       | 3.366(3)   | 146                | $3/2-x, -1/2+y, 1/2-z$ |
| N2-H1C...O2 | 0.89     | 2.22       | 2.993(2)   | 145                | $3/2-x, 1/2+y, 1/2-z$  |
| N2-H2...O1  | 0.93     | 2.03       | 2.763(2)   | 143                | $x, y, z$              |

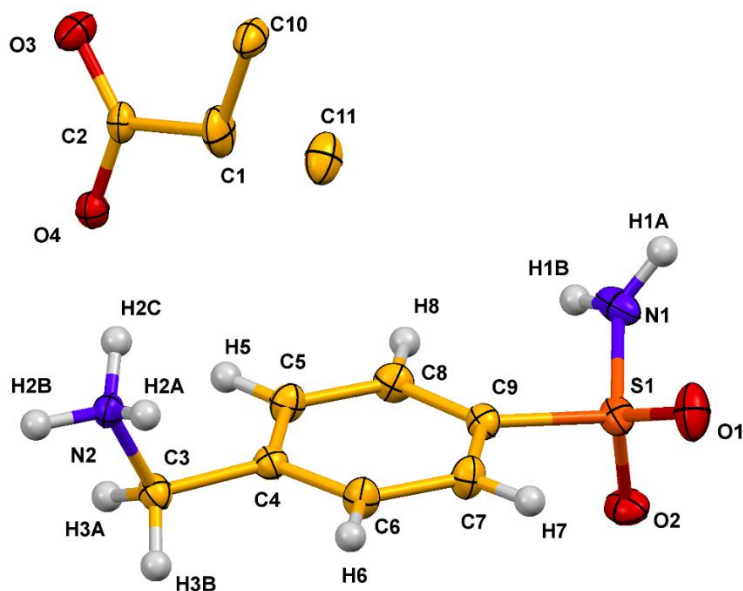

Fig. S6 ORTEP diagram of  $C_4 \cdot 2MAF$  (50% probability).

Table S9 Hydrogen bonding table of C<sub>4</sub>•2MAF.

| D-H...A     | d(D-A)/Å | d(H...A)/Å | d(D...A)/Å | ∠D-H...A/° | Symmetry           |
|-------------|----------|------------|------------|------------|--------------------|
| N1-H1A...O1 | 0.88     | 2.37       | 2.927(2)   | 122        | 3/2-x,-1/2+y,3/2-z |
| N2-H2A...O3 | 0.91     | 1.87       | 3.176(2)   | 175        | x,1+y,z            |
| N1-H2B...O4 | 0.91     | 1.91       | 2.757(2)   | 162        | -x,1-y,1-z         |
| N2-H2C...O4 | 0.91     | 1.84       | 2.807(3)   | 164        | x,y,z              |

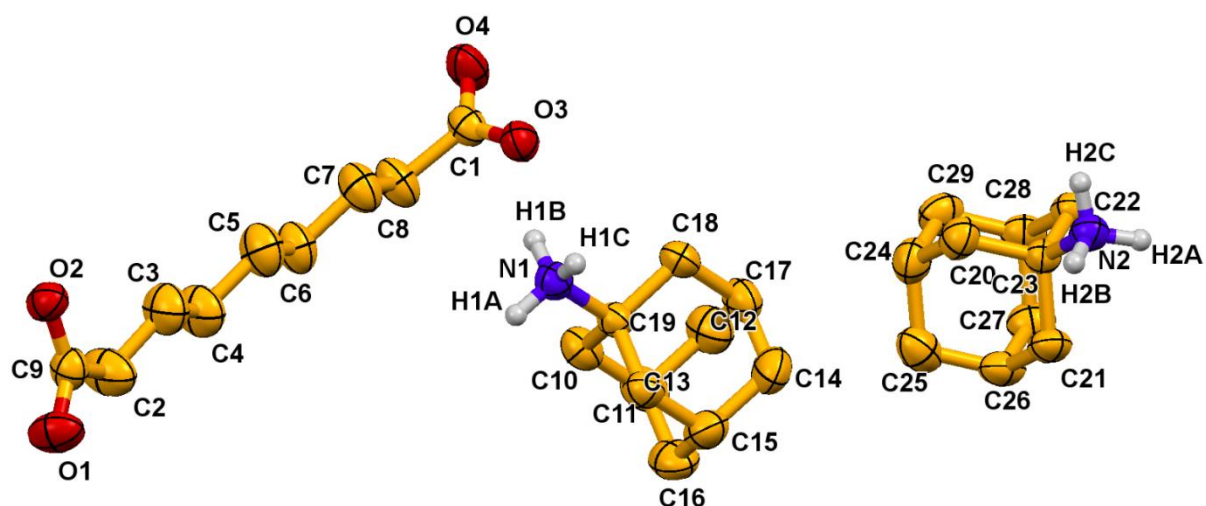

Fig. S7 ORTEP diagram of C<sub>7</sub>•2AMN (50% probability).

Table S10 Hydrogen bonding table of C<sub>7</sub>•2AMN.

| D-H...A     | d(D-A)/Å | d(H...A)/Å | d(D...A)/Å | ∠D-H...A/° | Symmetry         |
|-------------|----------|------------|------------|------------|------------------|
| N1-H1A...O4 | 0.89     | 1.89       | 2.774(4)   | 173        | x,-1+y,z         |
| N1-H1B...O3 | 0.89     | 1.92       | 2.792(4)   | 164        | x,y,z            |
| N1-H1C...O3 | 0.89     | 2.04       | 2.930(4)   | 174        | 1-x,-1/2+y,3/2-z |
| N2-H2A...O2 | 0.89     | 1.86       | 2.729(4)   | 167        | 1+x,1+y,z        |
| N2-H2B...O2 | 0.89     | 1.96       | 2.842(4)   | 169        | 1-x,1/2+y,3/2-z  |
| N1-H2C...O1 | 0.89     | 1.90       | 2.790(4)   | 174        | 1-x,3/2+y,3/2-z  |

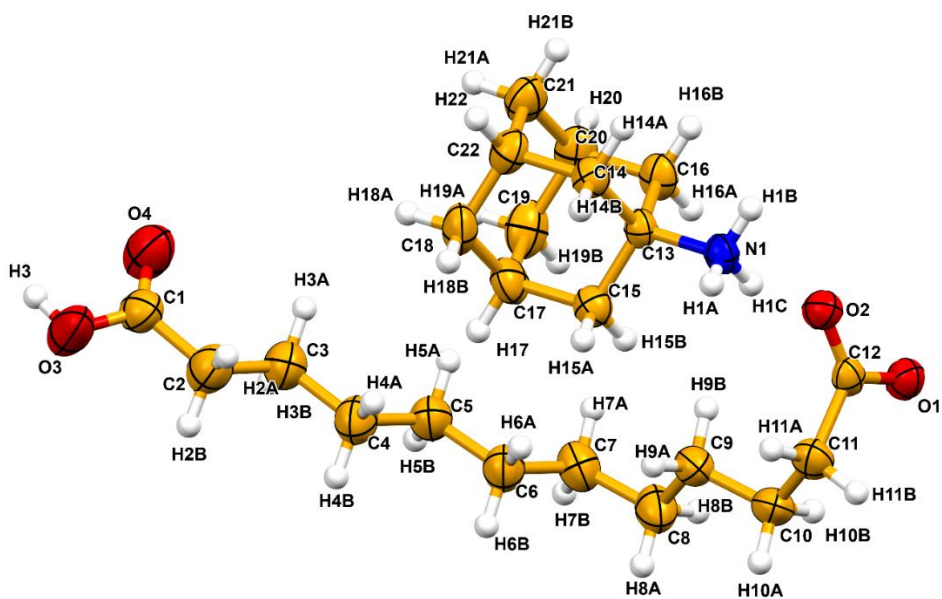

Fig. S8 ORTEP diagram of C10-H•AMN (50% probability).

Table S11 Hydrogen bonding table of C10-H•AMN.

| D-H...A     | d(D-A)/Å | d(H...A)/Å | d(D...A)/Å | ∠D-H...A/° | Symmetry     |
|-------------|----------|------------|------------|------------|--------------|
| N1-H1A...O1 | 0.89     | 1.96       | 2.837(3)   | 169        | -1+x, y, z   |
| N1-H1B...O2 | 0.89     | 2.01       | 2.871(3)   | 163        | 1-x, -y, 1-z |
| N1-H1C...O2 | 0.89     | 1.92       | 2.776(3)   | 160        | x, y, z      |
| O3-H3...O1  | 0.82     | 1.80       | 2.605(3)   | 168        | -1+x, 1+y, z |

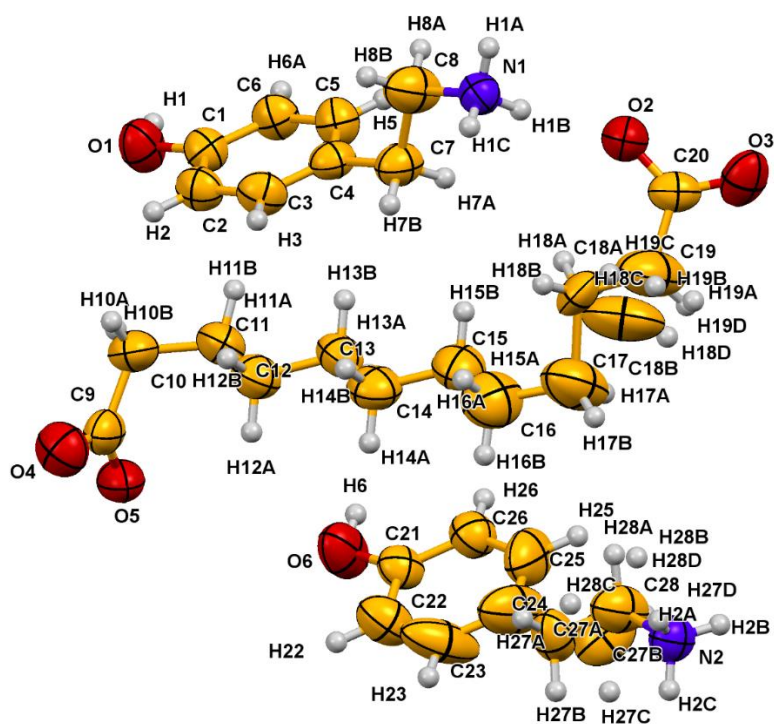

Fig. S9 ORTEP diagram of  $C_{10}\cdot 2TRM$  (50% probability).

Table S12 Hydrogen bonding table of  $C_{10}\cdot 2TRM$ .

| D-H...A     | d(D-A)/Å | d(H...A)/Å | d(D...A)/Å | $\angle D-H...A$ /° | Symmetry      |
|-------------|----------|------------|------------|---------------------|---------------|
| O1-H1...O3  | 0.82     | 1.91       | 2.712(8)   | 167                 | 1/2+x,1-y,z   |
| N1-H1A...O5 | 0.89     | 1.95       | 2.817(9)   | 166                 | 1-x,-y,-1/2+z |
| N1-H1B...O2 | 0.89     | 1.97       | 2.834(9)   | 164                 | x,y,z         |
| N1-H1C...O3 | 0.89     | 1.87       | 2.765(8)   | 179                 | x,-1+y,z      |
| N2-H1A...O4 | 0.89     | 1.90       | 2.784(10)  | 174                 | -1/2+x,-y,z   |
| N2-H2B...O5 | 0.89     | 1.83       | 2.715(9)   | 177                 | -1/2+x,1-y,z  |
| N2-H2C...O2 | 0.89     | 1.93       | 2.823(9)   | 176                 | 1/2-x,y,1/2+z |
| O6-H6...O4  | 0.82     | 1.89       | 2.828(3)   | 166                 | x,1+y,z       |

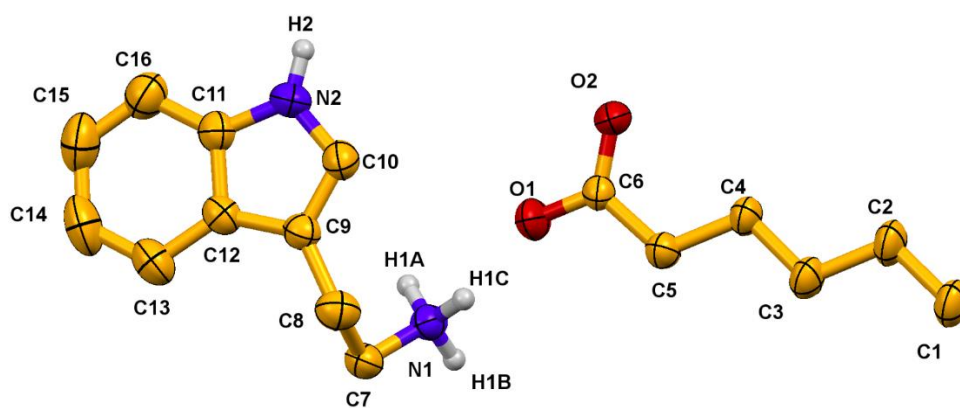

Fig. S10 ORTEP diagram of  $C_{10}\cdot 2TRP$  (50% probability).

Table S13 Hydrogen bonding table of  $C_{10}\cdot 2TRP$ .

| D-H...A     | d(D-A)/Å | d(H...A)/Å | d(D...A)/Å | $\angle D-H...A^\circ$ | Symmetry    |
|-------------|----------|------------|------------|------------------------|-------------|
| N1-H1A...O1 | 0.89     | 2.05       | 2.929(2)   | 168                    | 1-x,2-y,1-z |
| N2-H1A...O2 | 0.89     | 2.52       | 3.176(2)   | 131                    | 1-x,2-y,1-z |
| N1-H1B...O2 | 0.89     | 1.87       | 2.757(2)   | 177                    | 1+x,y,z     |
| N2-H1C...O1 | 0.89     | 1.95       | 2.807(3)   | 161                    | x,y,z       |
| N2-H2...O2  | 0.86     | 2.14       | 2.848(3)   | 139                    | -x,2-y,1-z  |

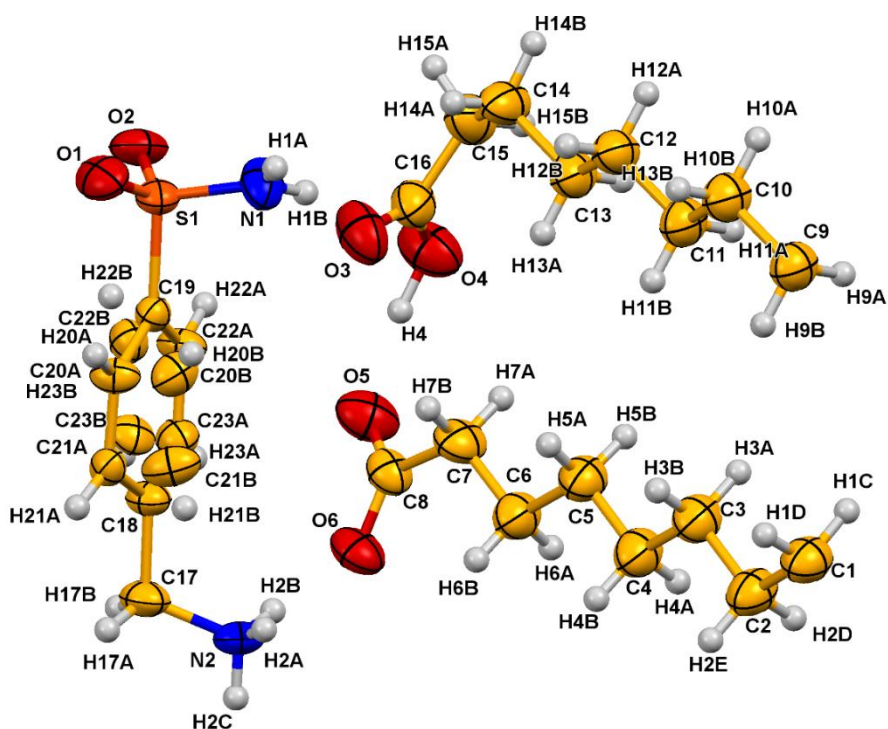

Fig. S11 ORTEP diagram of  $[C_{14}\cdot 2MAF].C_{14}-H_2$  (50% probability).

**Table S14 Hydrogen bonding table of [C<sub>14</sub>•2MAF].C<sub>14</sub>-H<sub>2</sub>.**

| D-H...A     | d(D-A)/Å | d(H...A)/Å | d(D...A)/Å | ∠D-H...A/° | Symmetry      |
|-------------|----------|------------|------------|------------|---------------|
| O1-H1...O3  | 0.82     | 1.91       | 2.712(8)   | 167        | 1/2+x,1-y,z   |
| N1-H1A...O5 | 0.89     | 1.95       | 2.817(9)   | 166        | 1-x,-y,-1/2+z |
| N1-H1B...O2 | 0.89     | 1.97       | 2.834(9)   | 164        | x,y,z         |
| N1-H1C...O3 | 0.89     | 1.87       | 2.765(8)   | 179        | x,-1+y,z      |
| N2-H1A...O4 | 0.89     | 1.90       | 2.784(10)  | 174        | -1/2+x,-y,z   |
| N2-H2B...O5 | 0.89     | 1.83       | 2.715(9)   | 177        | -1/2+x,1-y,z  |
| N2-H2C...O2 | 0.89     | 1.93       | 2.823(9)   | 176        | 1/2-x,y,1/2+z |
| O6-H6...O4  | 0.82     | 1.89       | 2.828(3)   | 166        | x,1+y,z       |

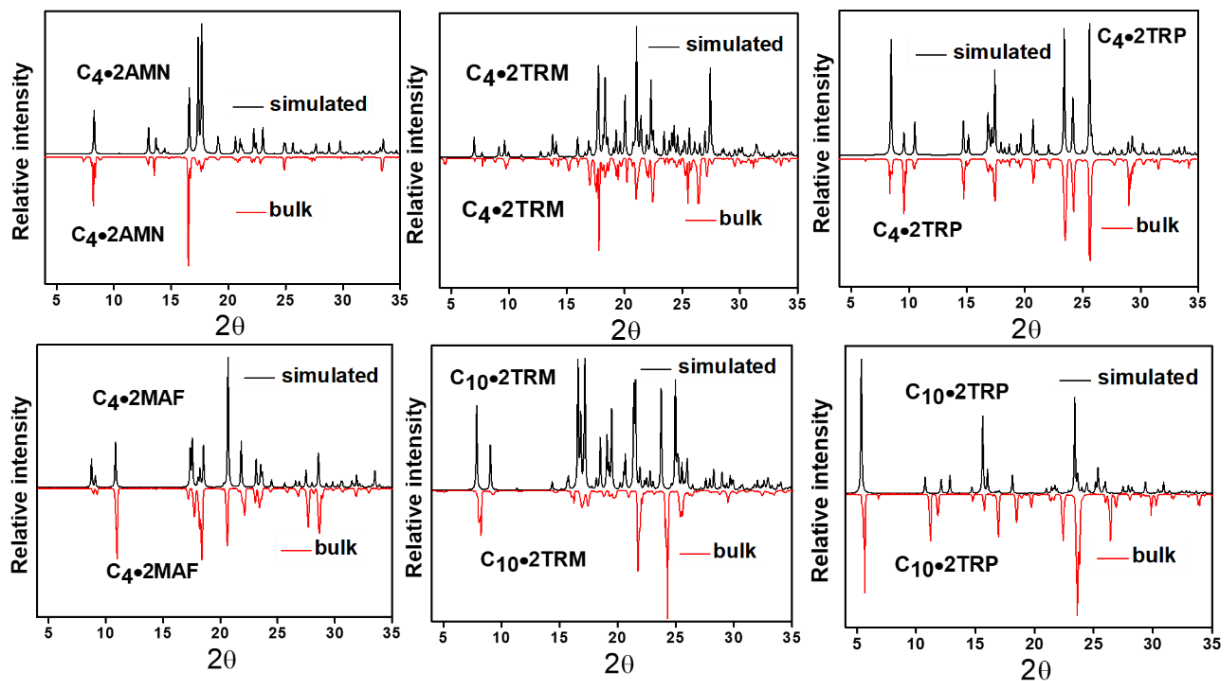

Fig. S12 PXR D (Simulated vs Bulk) comparison plots of various salts.

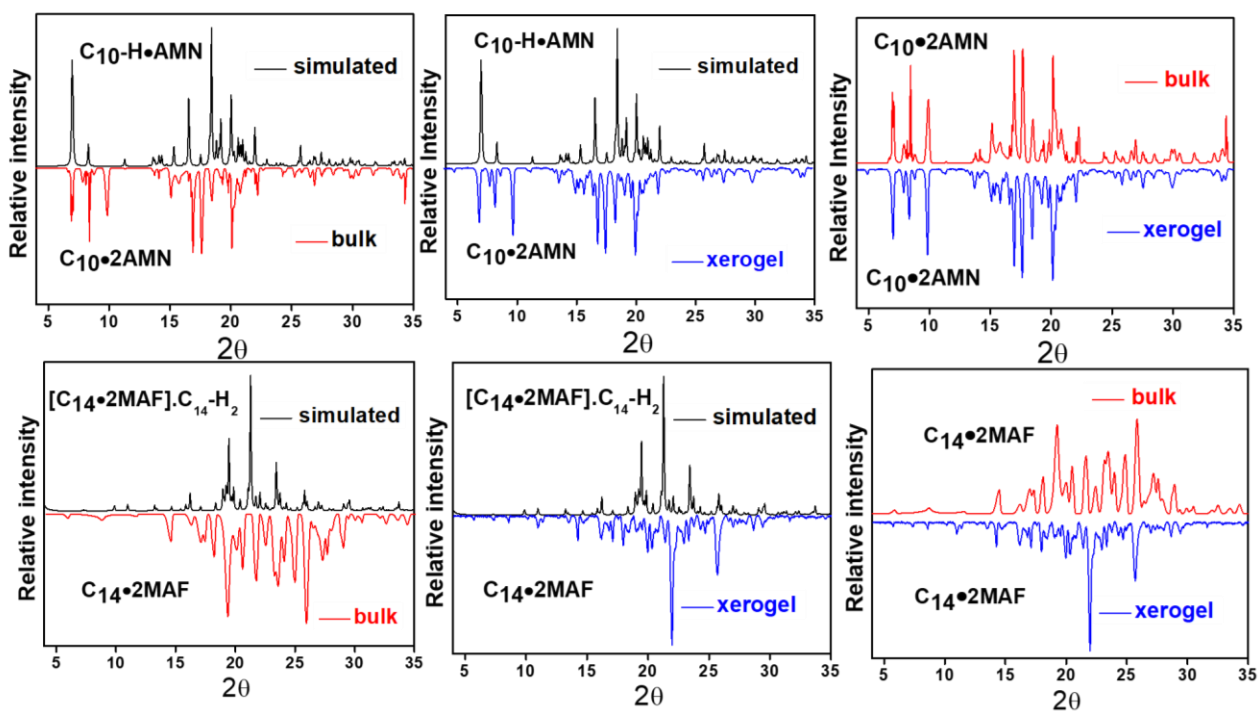

Fig. S13 PXR D plots of  $C_{10} \bullet 2AMN$  and  $C_{14} \bullet 2MAF$ .



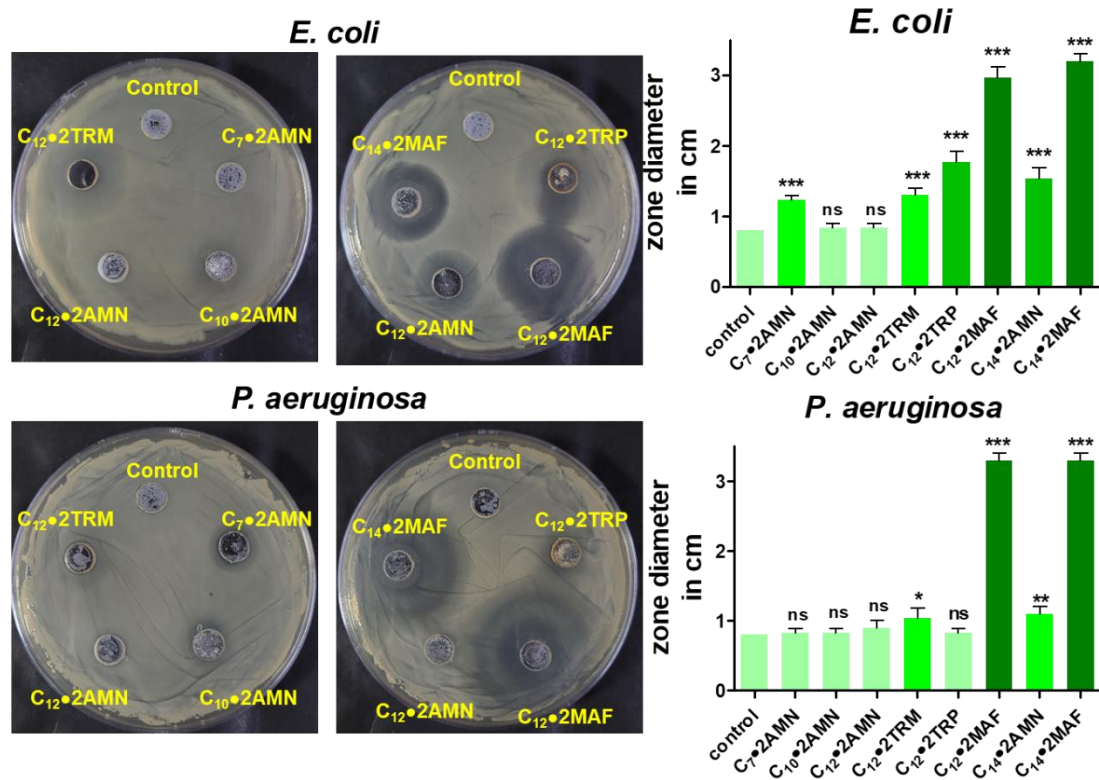

**Fig. S14 Zone Inhibition Assay of the gelators against Gram-negative bacterial *E. coli* and *P. aeruginosa*** In graphs, data were represented as mean+SD (n=3); where \*p<0.05, \*\*p<0.01, \*\*\*p<0.001 and ns is non-significant.

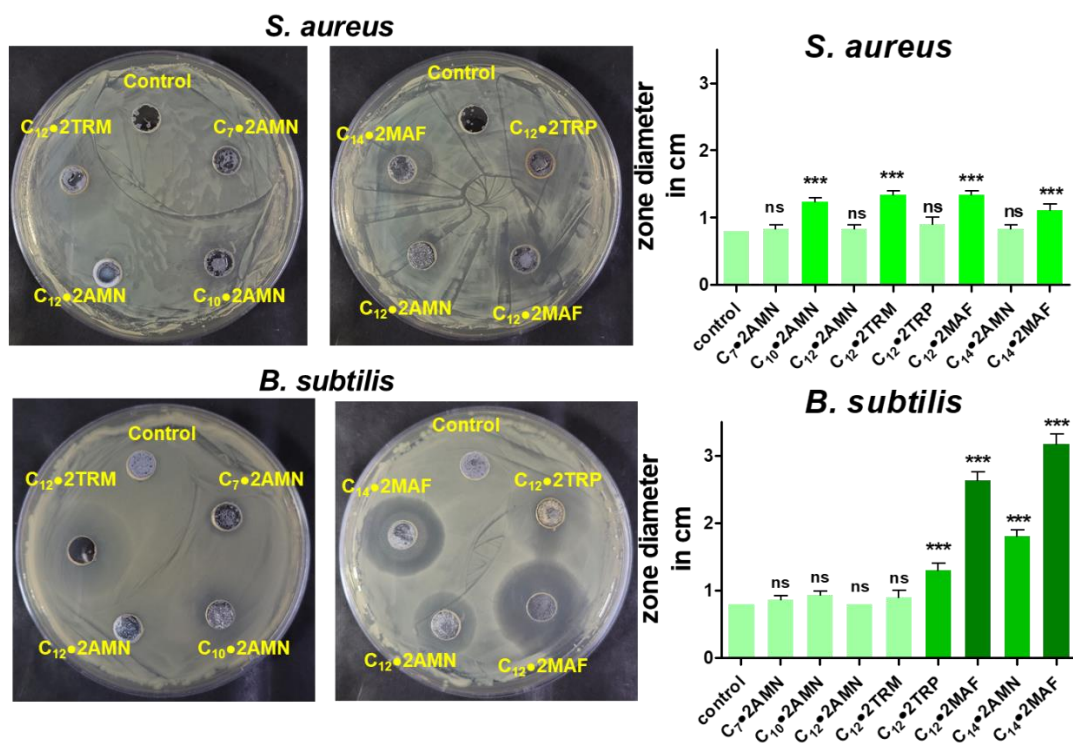

**Fig. S15 Zone Inhibition Assay of the gelators against Gram-positive bacterial *S. aureus* and *B. subtilis*** In graphs, data were represented as mean+SD (n=3); where \*p<0.05, \*\*p<0.01, \*\*\*p<0.001 and ns is non-significa

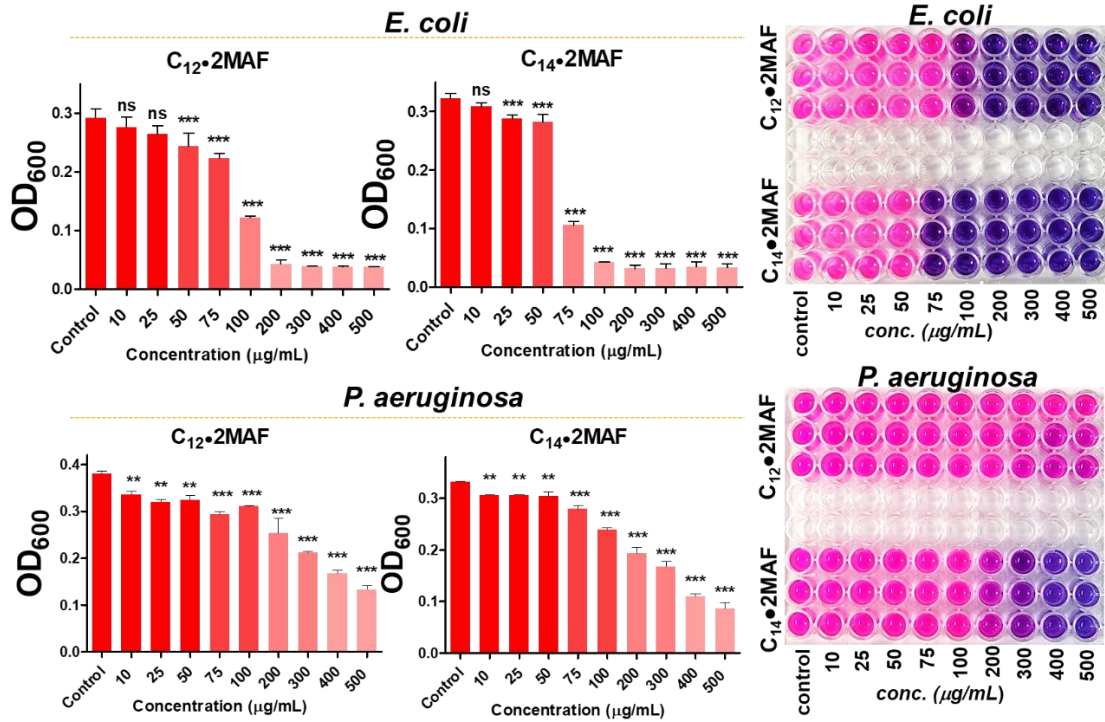

**Fig. S16 Determination of MIC (Turbidity and Resazurin assay) of C<sub>12</sub>•2MAF and C<sub>14</sub>•2MAF against Gram-negative bacterial *E. coli* and *P. aeruginosa*.** In graphs, data were represented as mean+SD (n=3); where \*p<0.05, \*\*p<0.01, \*\*\*p<0.001 and ns is non-significant.

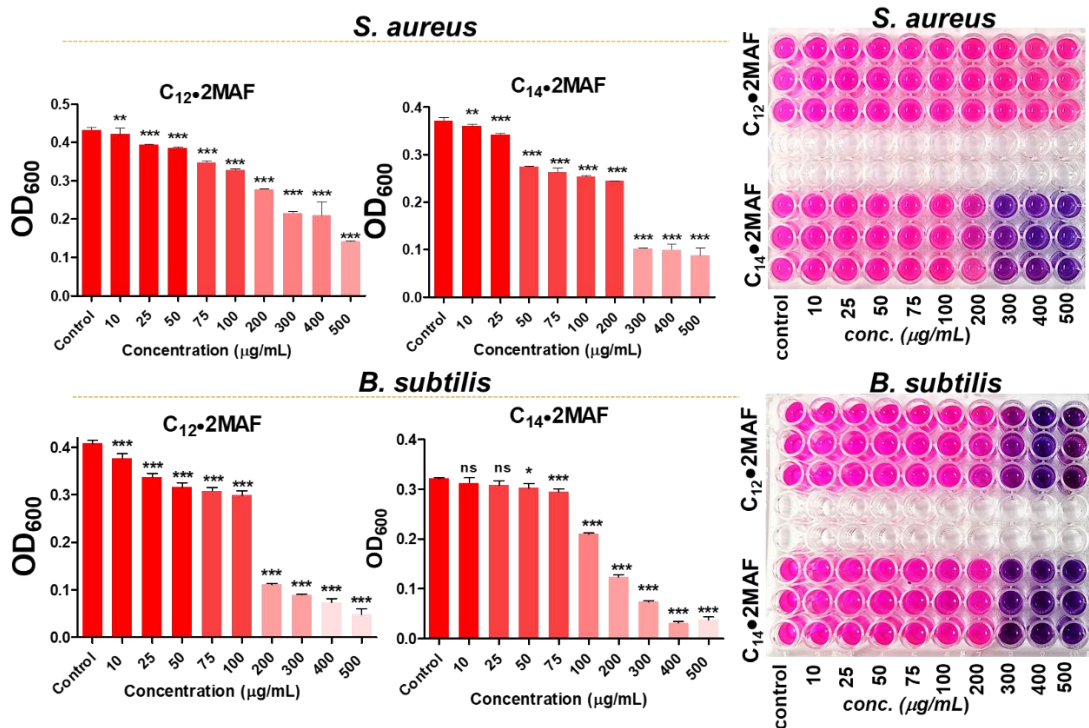

**Fig. S17 Determination of MIC (Turbidity and Resazurin assay) of C<sub>12</sub>•2MAF and C<sub>14</sub>•2MAF against Gram-positive bacterial *S. aureus* and *B. subtilis*.** In graphs, data were represented as mean+SD (n=3); where \*p<0.05, \*\*p<0.01, \*\*\*p<0.001 and ns is non-significant.

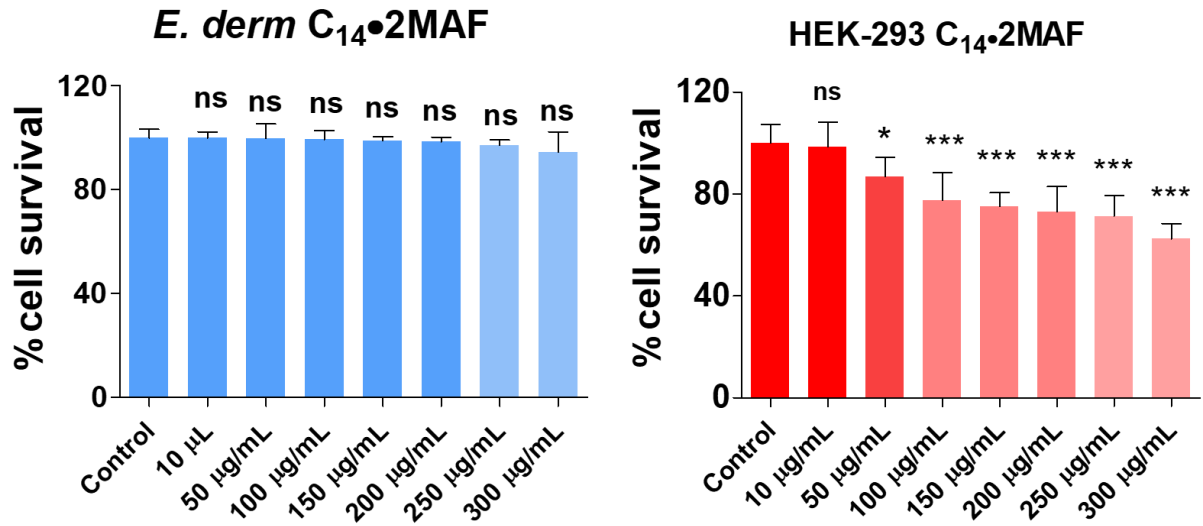

**Fig. S18 MTT assay of C<sub>14</sub>•2MAF against *E. derm* and HEK-293 cell lines.** In graphs, data were represented as mean+SD (n=3); where \*p<0.05, \*\*p<0.01, \*\*\*p<0.001 and ns is non-significant.

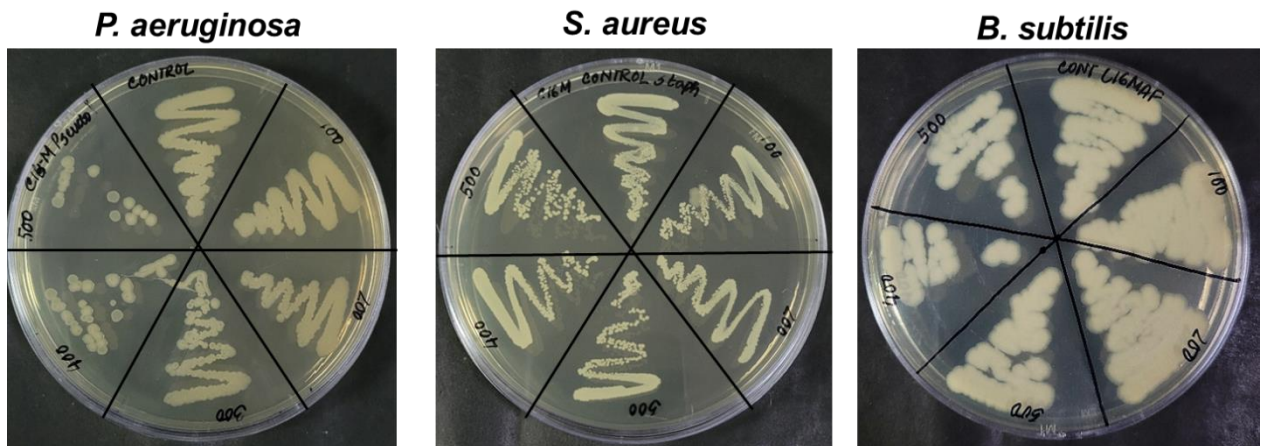

**Fig. S19 Dose dependent bacterial colony inhibition assay of C<sub>14</sub>•2MAF against *P. aeruginosa*, *S. aureus* and *B. subtilis*.**

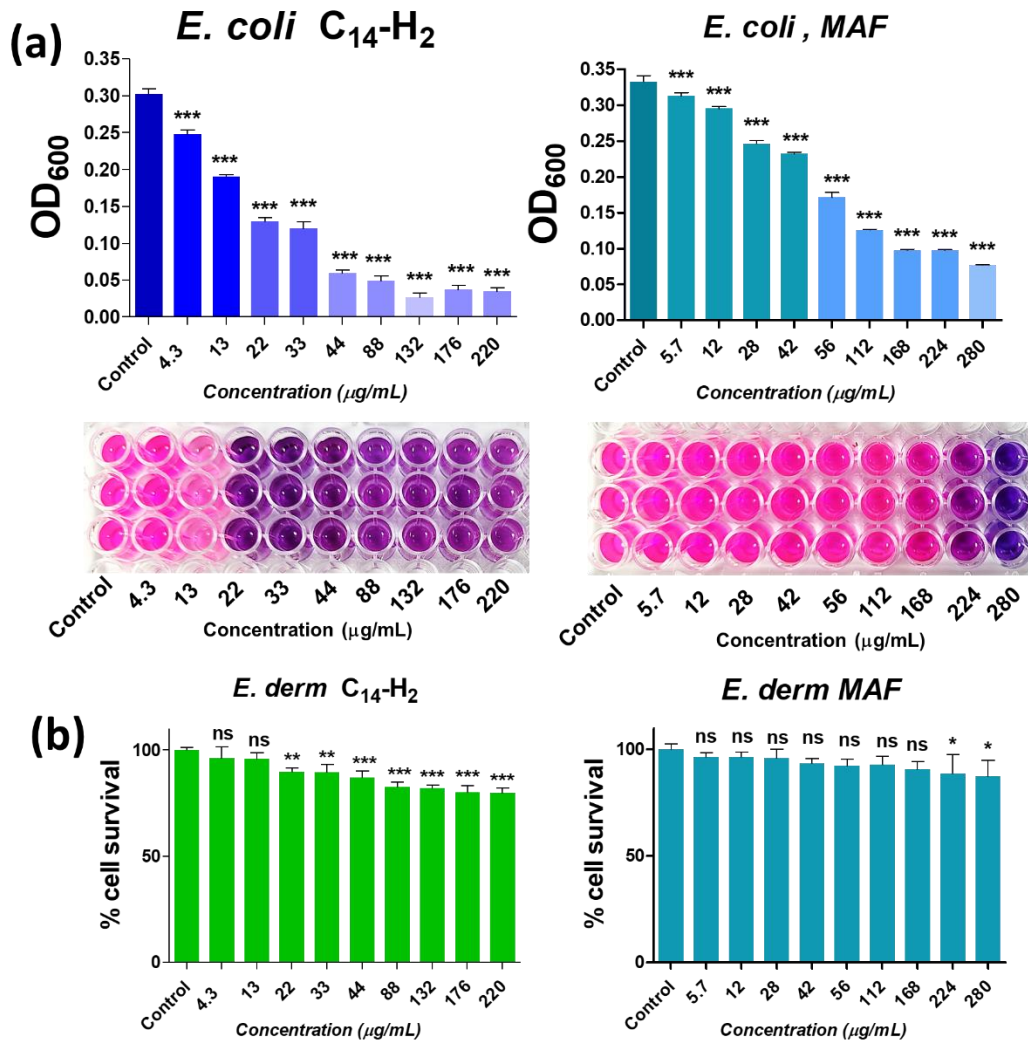

**Fig. S20 (a) Turbidity and Resazurin assay of the components present in gelator salt C<sub>14</sub>•2MAF (1 equivalent of C<sub>14</sub>-H<sub>2</sub> and 2 equivalents of MAF present in the corresponding weights) against *E. coli*. (b) MTT assay of components C<sub>14</sub>-H<sub>2</sub> and MAF against *E. derm*. In graphs, data were represented as mean+SD (n=3); where \*p<0.05, \*\*p<0.01, \*\*\*p<0.001 and ns is non-significant.**

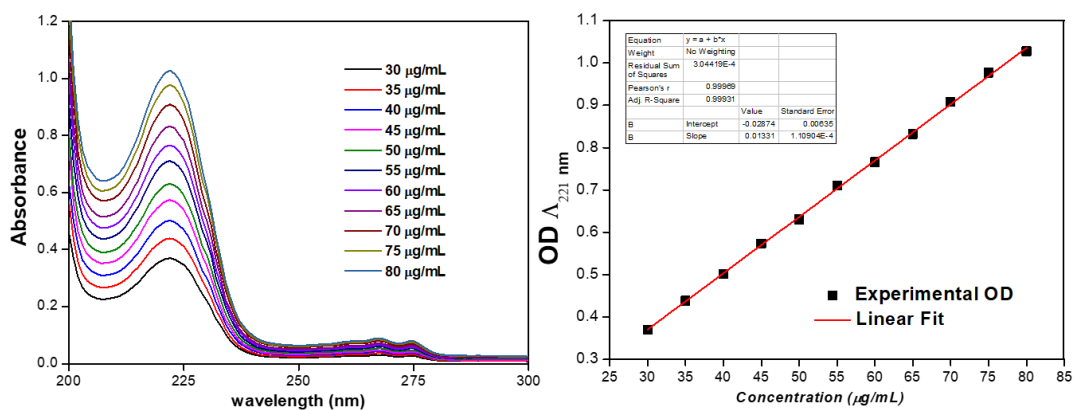

**Fig. S21 Standard calibration curves of C<sub>14</sub>•2MAF in water.**

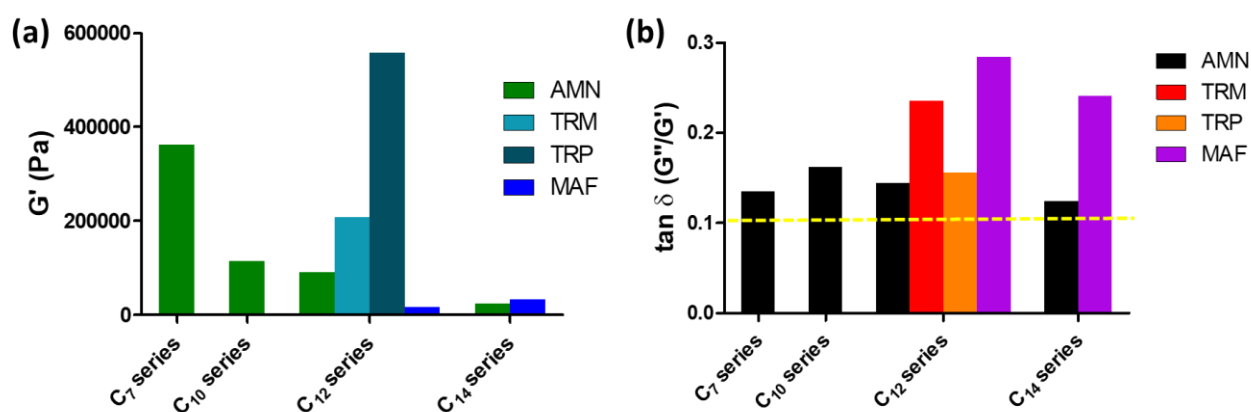

Fig. 22 (a)  $G'$  values of all MS gels (b)  $\tan \delta (G''/G')$  of the MS gels reported in this project.

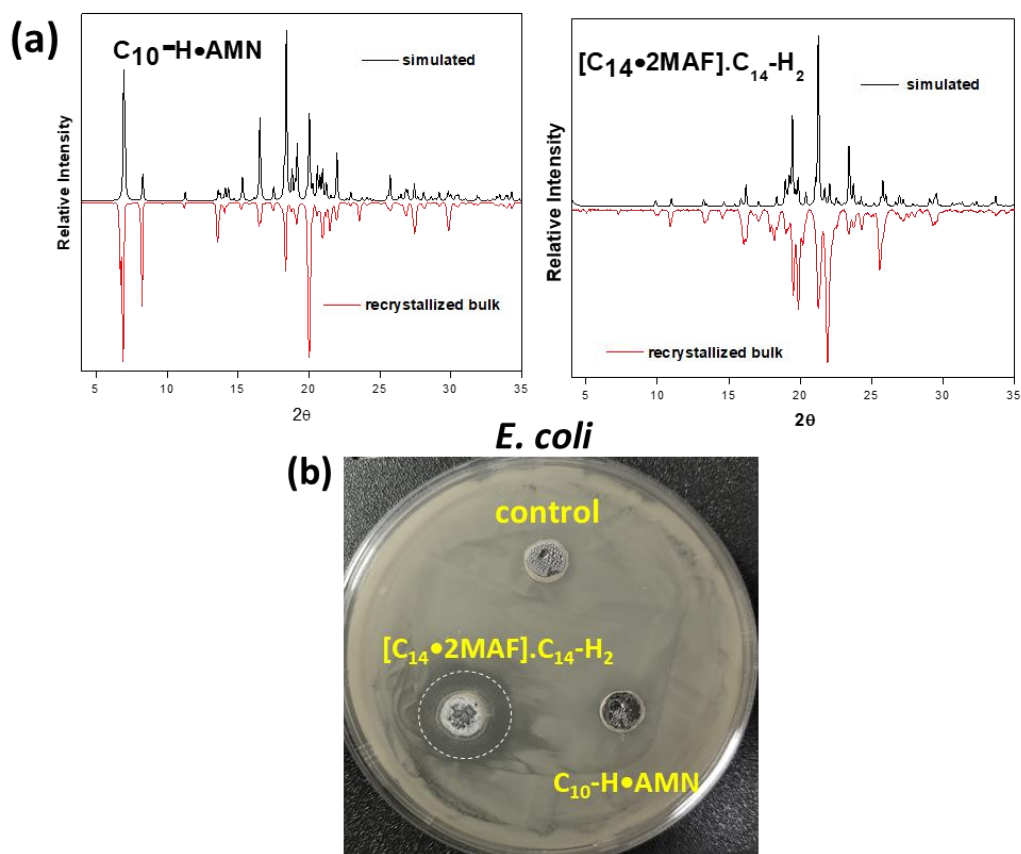

Fig. 23 (a) PXRD plots (Simulated vs Recrystallized bulks) of  $C_{10}\text{-H}\cdot\text{AMN}$  and  $[C_{14}\cdot 2\text{MAF}]\cdot C_{14}\text{-H}_2$  (b) Anti-bacterial zone inhibition assay of  $C_{10}\text{-H}\cdot\text{AMN}$  and  $[C_{14}\cdot 2\text{MAF}]\cdot C_{14}\text{-H}_2$  against *E. coli*.
